# Supplementary material for: Genomic Evidence for Direct Transmission of mecC-MRSA between a Horse and Its Veterinarian
Source: MDPI journal article supplement (doi:10.3390/antibiotics12020408), 2023-02-17
Supplement: s1 [file s1]

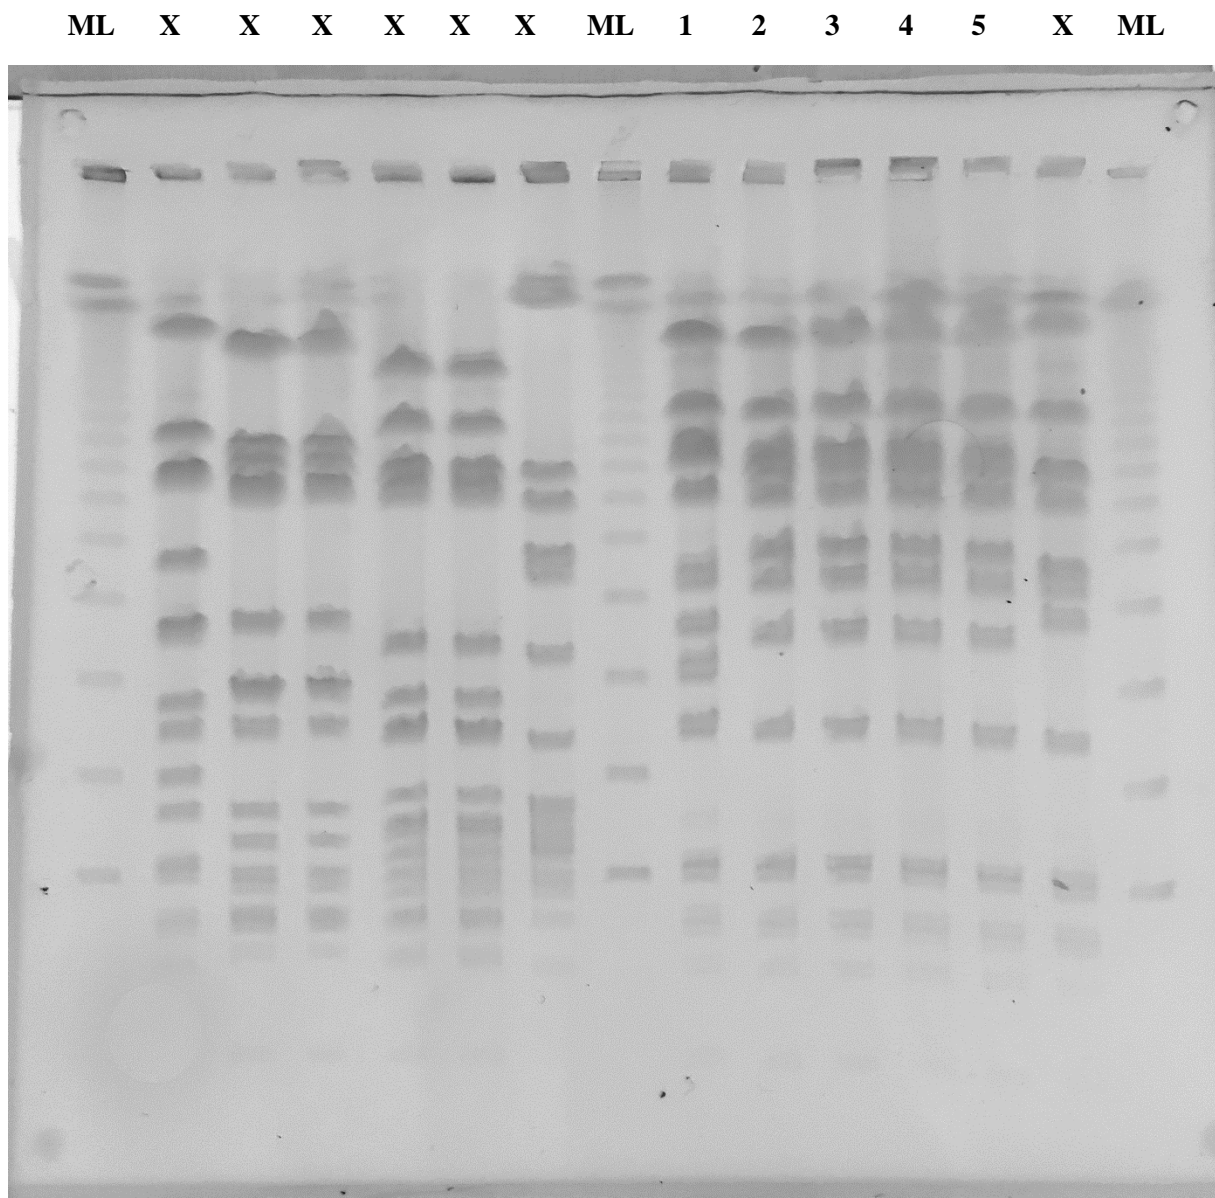

**Figure S1: Raw images: the original *S. aureus* PFGE gel pictures.**

ML: Lambda ( $\lambda$ ) DNA Marker (CHEF DNA size standard; catalog no. 170-3635; Bio-Rad).  
 X: strains are not used in this study. 1: EQ-B. 2: EQ-A1. 3: EQ-A2. 4: VET1. 5: VET2.

Fig 1 was generated from these original PFGE pictures.
