# Supplementary material for: Genomic Evidence for Direct Transmission of mecC-MRSA between a Horse and Its Veterinarian
Source: Antibiotics (Basel). 2023 Feb 17;12(2):408. doi: 10.3390/antibiotics12020408 (PMC9952710; doi:10.3390/antibiotics12020408)
Supplement: Supplementary file 1 [file antibiotics-12-00408-s001.zip]

Archive with 4 entries (4 files):
- Figure S1 - new.pdf
- Table S1.xlsx
- Table S2.xlsx
- Table S3.xlsx
