# Supplementary material for: Genomic Evidence for Direct Transmission of mecC-MRSA between a Horse and Its Veterinarian
Source: Antibiotics (Basel). 2023 Feb 17;12(2):408. doi: 10.3390/antibiotics12020408 (PMC9952710; doi:10.3390/antibiotics12020408)
Supplement: Supplementary file 1 [file antibiotics-12-00408-s001.zip › Table S1.xlsx]

## Sheet: MIC+DDT
Table S1. Antibiotic susceptibility tests of the mecC-MRSA isolates.
						EQ-B		EQ-A1		EQ-A2		VET-1		VET-2
Microdilution		Tested range	S	I	R	Category	MIC (mg/L)	Category	MIC (mg/L)	Category	MIC (mg/L)	Category	MIC (mg/L)	Category	MIC (mg/L)
Amoxicillin/clavulanic acid	AMC	2/1-16/8	≤ 4/2	-	≥ 8/4	S	<=2/1	S	<=2/1	S	<=2/1	S	<=2/1	S	<=2/1
Ampicillin	AMP	0.25-16	≤ 0.25	-	≥ 0.5	R	2	R	2	R	2	R	2	R	2
Ceftiofur	CET	0.125-4	≤ 2	4	≥ 8	I	4	I	4	I	4	I	4	I	4
Cephalothin	CTN	1-16	≤ 2	4	≥ 8	S	<=1	S	<=1	S	<=1	S	<=1	S	<=1
Enrofloxacin	ENR	0.0156-1	≤ 0.5	1-2	≥ 4	S	=0.125	S	=0.125	S	=0.125	S	=0.125	S	=0.125
Erythromycin	ERY	0.125-4	≤ 0.5	1-4	≥ 8	S	<=0.125	S	=0.25	S	=0.25	S	=0.25	S	=0.25
Florfenicol	FLL	1-8	≤ 2	4	≥ 8	S	<=1	S	<=1	S	<=1	S	<=1	S	<=1
Gentamicin	GEN	0.125-8	≤ 4	8	≥ 16	S	=0.25	S	=0.25	S	=0.25	S	=0.25	S	=0.25
Penicillin G	PEN	0.0625-8	≤ 0.12	-	≥ 0.25	R	1	R	2	R	2	R	2	R	2
Spectinomycin	SPT	4-64	≤ 64	-	≥ 128	R	>64	R	>64	R	>64	R	>64	R	>64
Trimthoprim/sulfmethoxazole	T/S	0.25/4.75-2/38	≤ 2/38	-	≥ 4/76	S	<=0.25/4.75	S	<=0.25/4.75	S	<=0.25/4.75	S	<=0.25/4.75	S	<=0.25/4.75
Tetracycline	TET	0.125-8	≤ 4	8	≥ 16	S	<=0.125	S	<=0.125	S	<=0.125	S	<=0.125	S	=0.25
Tiamulin	TIA	0.25-32	ND*	ND*	ND*	ND*	<=0.25	ND*	<=0.25	ND*	<=0.25	ND*	<=0.25	ND*	=0.5
Tilmicosin	TILM	0.5-16				S	<=0.5	S	<=0.5	S	<=0.5	S	<=0.5	S	1
Tulathromycin	TUL	1-64				S	4	S	4	S	4	S	4	S	4
Disc-diffusion testing		Tested concentration	S ≥		R <	Category	diameter (mm)	Category	diameter (mm)	Category	diameter (mm)	Category	diameter (mm)	Category	diameter (mm)
Chloramphenicol	C	30 µg	18	-	18	S	23	S	24	S	25	S	24	S	22
Ciprofloxacin	CIP	5 µg	50	-	21	I	19	I	20	I	22	I	20	I	20
Clindamycin	DA	2 µg	22	-	19	S	23	S	24	S	24	I	19	S	24
Fusidic acid	FA	10 µg	24	-	24	S	27	S	27	S	29	S	24	S	29
Kanamicin	K	30 µg	18	-	18	S	18	S	18	S	19	S	19	S	19
Linezolid	LNZ	10 µg	21	-	21	S	27	S	27	S	30	S	26	S	27
Quinupristin/dalofpristin	SYN	15 µg	21	-	18	S	22	S	22	S	25	S	22	S	25
Rifampicin	RA	5 µg	26	-	23	S	27	S	28	S	31	S	27	S	31
Streptomycin	S	10 µg	ND*	-	ND*	ND*	19	ND*	16	ND*	20	ND*	18	ND*	20
Tigecycline	TGC	15 µg	19	-	19	S	22	S	20	S	23	S	20	S	23
Tobramicin	TOB	10 µg	18	-	18	S	18	S	18	S	19	S	19	S	19
*ND= not defined
