# Supplementary material for: Genomic Evidence for Direct Transmission of mecC-MRSA between a Horse and Its Veterinarian
Source: Antibiotics (Basel). 2023 Feb 17;12(2):408. doi: 10.3390/antibiotics12020408 (PMC9952710; doi:10.3390/antibiotics12020408)
Supplement: Supplementary file 1 [file antibiotics-12-00408-s001.zip › Table S2.xlsx]

## Sheet: MLST_allele_differences
Table S2. MLST allele difference and SNP difference matrix in the analysed CC130 strains.
		349-H68B1-mecC_S3_L001_final.contigs	355-MDL-F18-090_S16_L001_final.contigs	356-F19-270_S17_L001_final.contigs	357-F20-054_S18_L001_final.contigs	ERR084771_final.contigs	ERR1422299_final.contigs	ERR1422306_final.contigs	ERR1422328_final.contigs	ERR1422329_final.contigs	ERR144771_final.contigs	ERR144788_final.contigs	ERR144792_final.contigs	ERR1577198_final.contigs	ERR1577207_final.contigs	ERR1577212_final.contigs	ERR1577214_final.contigs	ERR1577215_final.contigs	ERR1577217_final.contigs	ERR1577218_final.contigs	ERR1577220_final.contigs	ERR1577222_final.contigs	ERR1577224_final.contigs	ERR1577225_final.contigs	ERR1577227_final.contigs	ERR1577229_final.contigs	ERR1577231_final.contigs	ERR1577234_final.contigs	ERR1577235_final.contigs	ERR1577238_final.contigs	ERR1577239_final.contigs	ERR1577240_final.contigs	ERR1577241_final.contigs	ERR1577242_final.contigs	ERR1577243_final.contigs	ERR956213_final.contigs	ERR956220_final.contigs	ERR956227_final.contigs	ERR956241_final.contigs
		H68B1	EQ-B	VET-1	EQ-A1	Patient A1_ERR084771	C6771_ERS1026449	C8671_ERS1026380	C8699_ERS1026424	C8483_ERS1026426	Sheep B1_ERR144771	Patient B_ERR144788	Cow A_ERR144792	F1_ERR1577198	H1a_ERR1577207	H4_ERR1577212	H6_ERR1577214	H7_ERR1577215	H9_ERR1577217	H10_ERR1577218	H12_ERR1577220	H14_ERR1577222	H16_ERR1577224	H17_ERR1577225	H19_ERR1577227	H21_ERR1577229	H23_ERR1577231	H26_ERR1577234	H27_ERR1577235	H30_ERR1577238	H31_ERR1577239	H32_ERR1577240	H33_ERR1577241	H34_ERR1577242	H35_ERR1577243	C3630_ERS659507	C5802_ERS659514	C6595_ERS659521	C7246_ERS659535
349-H68B1-mecC_S3_L001_final.contigs	H68B1	0	219	127	128	215	259	287	271	303	238	222	237	224	228	226	233	241	219	217	235	235	224	219	224	246	243	243	215	233	246	239	218	226	258	526	283	289	292
355-MDL-F18-090_S16_L001_final.contigs	EQ-B	219	0	231	232	224	281	307	295	184	253	238	249	237	240	237	241	256	236	232	252	247	239	234	234	254	254	248	225	149	157	171	148	246	285	540	293	312	313
356-F19-270_S17_L001_final.contigs	VET-1	127	231	0	5	217	267	294	274	310	240	226	243	226	229	234	237	241	225	217	235	236	228	218	226	251	251	245	221	239	251	247	227	233	265	528	287	304	304
357-F20-054_S18_L001_final.contigs	EQ-A1	128	232	5	0	220	268	295	274	311	242	229	244	228	231	236	239	243	227	219	237	238	232	223	229	254	254	248	224	241	253	250	228	235	266	530	286	305	305
ERR084771_final.contigs	Patient A1_ERR084771	215	224	217	220	0	258	296	284	307	92	69	96	85	92	83	90	106	78	79	96	94	85	68	76	153	168	160	134	243	253	250	224	236	271	529	277	298	298
ERR1422299_final.contigs	C6771_ERS1026449	259	281	267	268	258	0	350	339	363	275	267	274	264	264	268	269	280	262	259	270	269	266	258	260	285	288	279	257	296	311	300	279	285	314	562	325	355	358
ERR1422306_final.contigs	C8671_ERS1026380	287	307	294	295	296	350	0	149	383	316	299	318	298	302	308	309	321	302	294	308	308	305	298	299	322	328	319	292	320	325	324	307	309	339	584	367	181	183
ERR1422328_final.contigs	C8699_ERS1026424	271	295	274	274	284	339	149	0	370	298	284	301	283	283	293	295	305	285	278	295	291	285	282	284	313	310	301	280	308	317	318	298	297	330	576	353	159	161
ERR1422329_final.contigs	C8483_ERS1026426	303	184	310	311	307	363	383	370	0	333	318	331	320	326	322	322	340	322	308	332	327	320	310	318	339	331	336	307	235	240	252	236	323	355	598	381	389	377
ERR144771_final.contigs	Sheep B1_ERR144771	238	253	240	242	92	275	316	298	333	0	92	78	86	93	88	90	105	79	83	56	54	68	102	101	178	194	183	158	266	272	268	249	256	288	542	296	309	314
ERR144788_final.contigs	Patient B_ERR144788	222	238	226	229	69	267	299	284	318	92	0	101	89	98	83	91	109	76	89	101	96	93	85	80	156	171	169	145	256	262	261	231	244	281	540	286	298	303
ERR144792_final.contigs	Cow A_ERR144792	237	249	243	244	96	274	318	301	331	78	101	0	92	99	89	91	110	82	84	84	82	77	103	109	180	194	185	164	266	272	272	252	259	294	540	300	314	317
ERR1577198_final.contigs	F1_ERR1577198	224	237	226	228	85	264	298	283	320	86	89	92	0	19	45	66	82	58	65	83	86	77	91	95	162	178	172	141	250	264	264	236	246	279	533	283	306	311
ERR1577207_final.contigs	H1a_ERR1577207	228	240	229	231	92	264	302	283	326	93	98	99	19	0	52	75	87	67	69	88	91	80	93	100	169	185	175	148	258	272	267	242	251	283	535	281	308	313
ERR1577212_final.contigs	H4_ERR1577212	226	237	234	236	83	268	308	293	322	88	83	89	45	52	0	67	92	56	69	91	89	83	94	97	157	174	171	148	256	264	259	235	250	285	541	291	311	313
ERR1577214_final.contigs	H6_ERR1577214	233	241	237	239	90	269	309	295	322	90	91	91	66	75	67	0	88	58	69	92	93	81	93	96	165	181	180	152	258	264	267	239	252	287	544	296	314	317
ERR1577215_final.contigs	H7_ERR1577215	241	256	241	243	106	280	321	305	340	105	109	110	82	87	92	88	0	80	84	104	108	97	110	113	188	199	192	167	268	284	283	255	262	298	549	304	327	331
ERR1577217_final.contigs	H9_ERR1577217	219	236	225	227	78	262	302	285	322	79	76	82	58	67	56	58	80	0	64	83	77	76	90	93	159	177	167	144	255	261	257	235	242	280	533	284	298	300
ERR1577218_final.contigs	H10_ERR1577218	217	232	217	219	79	259	294	278	308	83	89	84	65	69	69	69	84	64	0	79	82	68	79	86	153	171	168	137	247	261	257	229	240	275	533	278	303	306
ERR1577220_final.contigs	H12_ERR1577220	235	252	235	237	96	270	308	295	332	56	101	84	83	88	91	92	104	83	79	0	58	68	101	103	176	191	185	156	263	274	274	248	255	287	541	296	313	320
ERR1577222_final.contigs	H14_ERR1577222	235	247	236	238	94	269	308	291	327	54	96	82	86	91	89	93	108	77	82	58	0	69	100	106	178	190	181	155	260	265	264	243	250	287	545	290	301	308
ERR1577224_final.contigs	H16_ERR1577224	224	239	228	232	85	266	305	285	320	68	93	77	77	80	83	81	97	76	68	68	69	0	86	93	170	181	175	145	251	260	261	236	245	278	534	287	304	313
ERR1577225_final.contigs	H17_ERR1577225	219	234	218	223	68	258	298	282	310	102	85	103	91	93	94	93	110	90	79	101	100	86	0	85	158	175	170	141	248	259	256	231	238	273	532	275	306	310
ERR1577227_final.contigs	H19_ERR1577227	224	234	226	229	76	260	299	284	318	101	80	109	95	100	97	96	113	93	86	103	106	93	85	0	156	174	173	141	253	263	261	235	242	277	533	283	305	313
ERR1577229_final.contigs	H21_ERR1577229	246	254	251	254	153	285	322	313	339	178	156	180	162	169	157	165	188	159	153	176	178	170	158	156	0	195	200	167	272	281	280	247	264	292	555	304	326	333
ERR1577231_final.contigs	H23_ERR1577231	243	254	251	254	168	288	328	310	331	194	171	194	178	185	174	181	199	177	171	191	190	181	175	174	195	0	188	156	271	279	275	248	264	297	555	308	332	332
ERR1577234_final.contigs	H26_ERR1577234	243	248	245	248	160	279	319	301	336	183	169	185	172	175	171	180	192	167	168	185	181	175	170	173	200	188	0	111	271	280	276	253	257	294	551	298	311	318
ERR1577235_final.contigs	H27_ERR1577235	215	225	221	224	134	257	292	280	307	158	145	164	141	148	148	152	167	144	137	156	155	145	141	141	167	156	111	0	242	252	251	221	233	263	526	272	296	302
ERR1577238_final.contigs	H30_ERR1577238	233	149	239	241	243	296	320	308	235	266	256	266	250	258	256	258	268	255	247	263	260	251	248	253	272	271	271	242	0	128	186	167	258	293	551	308	325	325
ERR1577239_final.contigs	H31_ERR1577239	246	157	251	253	253	311	325	317	240	272	262	272	264	272	264	264	284	261	261	274	265	260	259	263	281	279	280	252	128	0	194	173	271	299	558	316	329	327
ERR1577240_final.contigs	H32_ERR1577240	239	171	247	250	250	300	324	318	252	268	261	272	264	267	259	267	283	257	257	274	264	261	256	261	280	275	276	251	186	194	0	128	267	296	564	315	326	325
ERR1577241_final.contigs	H33_ERR1577241	218	148	227	228	224	279	307	298	236	249	231	252	236	242	235	239	255	235	229	248	243	236	231	235	247	248	253	221	167	173	128	0	242	277	545	298	316	318
ERR1577242_final.contigs	H34_ERR1577242	226	246	233	235	236	285	309	297	323	256	244	259	246	251	250	252	262	242	240	255	250	245	238	242	264	264	257	233	258	271	267	242	0	278	530	305	316	316
ERR1577243_final.contigs	H35_ERR1577243	258	285	265	266	271	314	339	330	355	288	281	294	279	283	285	287	298	280	275	287	287	278	273	277	292	297	294	263	293	299	296	277	278	0	504	333	347	351
ERR956213_final.contigs	C3630_ERS659507	526	540	528	530	529	562	584	576	598	542	540	540	533	535	541	544	549	533	533	541	545	534	532	533	555	555	551	526	551	558	564	545	530	504	0	589	592	589
ERR956220_final.contigs	C5802_ERS659514	283	293	287	286	277	325	367	353	381	296	286	300	283	281	291	296	304	284	278	296	290	287	275	283	304	308	298	272	308	316	315	298	305	333	589	0	372	370
ERR956227_final.contigs	C6595_ERS659521	289	312	304	305	298	355	181	159	389	309	298	314	306	308	311	314	327	298	303	313	301	304	306	305	326	332	311	296	325	329	326	316	316	347	592	372	0	162
ERR956241_final.contigs	C7246_ERS659535	292	313	304	305	298	358	183	161	377	314	303	317	311	313	313	317	331	300	306	320	308	313	310	313	333	332	318	302	325	327	325	318	316	351	589	370	162	0
		Minimum allele diferences of HUN strains from other isolates:						148
		Maximum allele diferences of HUN strains from other isolates:						540

## Sheet: SNP_difference_matrix
Table S2. MLST allele difference and SNP difference matrix in the analysed CC130 strains.
		X349.H68B1.mecC_S3_L001	X355.MDL.F18.090_S16_L001	X356.F19.270_S17_L001	X357.F20.054_S18_L001	ERR084771	ERR1422299	ERR1422306	ERR1422328	ERR1422329	ERR144771	ERR144788	ERR144792	ERR1577198	ERR1577207	ERR1577212	ERR1577214	ERR1577215	ERR1577217	ERR1577218	ERR1577220	ERR1577222	ERR1577224	ERR1577225	ERR1577227	ERR1577229	ERR1577231	ERR1577234	ERR1577235	ERR1577238	ERR1577239	ERR1577240	ERR1577241	ERR1577242	ERR1577243	ERR956213	ERR956220	ERR956227	ERR956241
		H68B1	EQ-B	VET-1	EQ-A1	Patient A1_ERR084771	C6771_ERS1026449	C8671_ERS1026380	C8699_ERS1026424	C8483_ERS1026426	Sheep B1_ERR144771	Patient B_ERR144788	Cow A_ERR144792	F1_ERR1577198	H1a_ERR1577207	H4_ERR1577212	H6_ERR1577214	H7_ERR1577215	H9_ERR1577217	H10_ERR1577218	H12_ERR1577220	H14_ERR1577222	H16_ERR1577224	H17_ERR1577225	H19_ERR1577227	H21_ERR1577229	H23_ERR1577231	H26_ERR1577234	H27_ERR1577235	H30_ERR1577238	H31_ERR1577239	H32_ERR1577240	H33_ERR1577241	H34_ERR1577242	H35_ERR1577243	C3630_ERS659507	C5802_ERS659514	C6595_ERS659521	C7246_ERS659535
X349.H68B1.mecC_S3_L001	H68B1	0	4051	2598	2585	6876	5140	3966	4805	3944	4934	5955	6703	12269	12129	14784	8096	9771	12933	14255	8345	11954	9966	11769	13254	13138	13452	12966	4954	10263	4511	4410	9186	14874	15594	7642	5683	5772	6485
X355.MDL.F18.090_S16_L001	EQ-B	4051	0	2547	2522	7936	4796	4648	4184	4240	5810	7050	7605	13641	13193	15425	8075	10593	13487	14793	9171	13166	9959	12870	14144	13732	14204	13224	6055	10820	5150	4931	10025	15950	15986	7635	6106	6666	6537
X356.F19.270_S17_L001	VET-1	2598	2547	0	729	8313	5177	5110	5016	5113	6258	7342	8050	13573	13349	15673	8306	10949	13697	15060	9625	13240	10169	12882	14263	13862	14234	14038	6284	11307	5779	5680	10390	15953	16403	7902	6546	7017	7147
X357.F20.054_S18_L001	EQ-A1	2585	2522	729	0	8177	5081	5068	4888	5046	6153	7252	7932	13488	13317	15598	8264	10864	13625	14942	9571	13119	10145	12780	14128	13784	14124	13923	6169	11271	5715	5584	10289	15823	16301	7814	6449	6924	7021
ERR084771	Patient A1_ERR084771	6876	7936	8313	8177	0	7382	6280	6826	5806	3296	2123	3561	10642	10758	12222	6899	9739	10888	11587	7849	10440	8275	9965	11295	11110	11238	11273	3536	10068	4123	4237	8260	12369	12577	7104	5414	5707	5434
ERR1422299	C6771_ERS1026449	5140	4796	5177	5081	7382	0	4228	2609	4122	5295	6427	7114	13175	12819	15094	8131	10920	13278	14713	9296	12814	9912	12413	13732	13184	13773	13333	5305	11188	5016	4769	9924	15436	15737	6638	5447	5979	5738
ERR1422306	C8671_ERS1026380	3966	4648	5110	5068	6280	4228	0	3221	2695	4038	5414	5888	12577	12590	14744	8098	9905	12869	14074	8139	12273	9753	11916	13396	12997	13386	12846	4428	10129	3585	3395	9308	15096	15209	7219	5197	4231	4781
ERR1422328	C8699_ERS1026424	4805	4184	5016	4888	6826	2609	3221	0	3372	4621	5982	6475	13131	12865	14977	7976	10659	13189	14503	8910	12800	9741	12426	13797	13261	13650	12887	4988	10971	4243	4051	9790	15372	15347	6409	5036	5047	4462
ERR1422329	C8483_ERS1026426	3944	4240	5113	5046	5806	4122	2695	3372	0	3323	4910	5240	12136	12058	14411	7759	9605	12642	13719	7653	11825	9509	11359	13025	12920	13126	12529	3883	9694	2688	2512	8622	14666	14827	6828	4608	4690	5301
ERR144771	Sheep B1_ERR144771	4934	5810	6258	6153	3296	5295	4038	4621	3323	0	2211	2709	10768	10958	13210	7394	8925	11654	12457	6720	10509	8935	10014	11858	11766	11855	11522	1955	9277	1705	1698	7898	13241	13547	5276	3333	3639	3556
ERR144788	Patient B_ERR144788	5955	7050	7342	7252	2123	6427	5414	5982	4910	2211	0	3045	10316	10442	12430	7063	9422	11008	11924	7310	10067	8607	9646	11186	11298	11333	11329	2550	9772	3175	3261	7879	12506	12997	6126	4367	4744	4517
ERR144792	Cow A_ERR144792	6703	7605	8050	7932	3561	7114	5888	6475	5240	2709	3045	0	9942	10095	12178	6967	8591	10548	11248	6687	9635	8416	9285	10714	10721	10836	10459	3597	8766	3546	3630	7582	12057	12379	7038	5062	5397	5110
ERR1577198	F1_ERR1577198	12269	13641	13573	13488	10642	13175	12577	13131	12136	10768	10316	9942	0	4532	7647	5662	5532	6390	7305	6299	4461	6767	4494	5646	6854	6461	5560	10891	5397	11103	11119	6367	7091	8753	13770	12215	12418	12465
ERR1577207	H1a_ERR1577207	12129	13193	13349	13317	10758	12819	12590	12865	12058	10958	10442	10095	4532	0	7473	5489	5635	6246	7221	6847	4338	6726	4608	5424	6787	6281	4958	10936	5540	11333	11365	6744	6884	8617	13433	11827	12087	12339
ERR1577212	H4_ERR1577212	14784	15425	15673	15598	12222	15094	14744	14977	14411	13210	12430	12178	7647	7473	0	3027	9474	3683	3931	10449	7214	3683	7414	4537	3725	4488	5100	13189	9137	13548	13608	10124	5250	5108	15098	14142	14491	14211
ERR1577214	H6_ERR1577214	8096	8075	8306	8264	6899	8131	8098	7976	7759	7394	7063	6967	5662	5489	3027	0	6060	3305	3212	6619	5475	901	5704	4249	3285	3936	4498	7481	6023	7499	7552	6541	4375	3163	8031	7720	8067	7643
ERR1577215	H7_ERR1577215	9771	10593	10949	10864	9739	10920	9905	10659	9605	8925	9422	8591	5532	5635	9474	6060	0	8089	8886	4882	5214	7479	5479	7610	8514	7820	6840	9377	3631	9044	9023	6003	8649	10099	12253	10558	10687	10718
ERR1577217	H9_ERR1577217	12933	13487	13697	13625	10888	13278	12869	13189	12642	11654	11008	10548	6390	6246	3683	3305	8089	0	3137	9036	5928	4091	6269	3473	2681	3080	4134	11557	7910	11912	11977	8547	4771	5308	13386	12494	12865	12645
ERR1577218	H10_ERR1577218	14255	14793	15060	14942	11587	14713	14074	14503	13719	12457	11924	11248	7305	7221	3931	3212	8886	3137	0	9828	6690	3846	7122	4069	3137	3688	4469	12568	8642	12806	12874	9624	5157	5182	14735	13455	13868	13607
ERR1577220	H12_ERR1577220	8345	9171	9625	9571	7849	9296	8139	8910	7653	6720	7310	6687	6299	6847	10449	6619	4882	9036	9828	0	6527	7993	5905	8616	9507	9173	7966	7275	5119	7101	7053	4999	10029	11104	10604	8587	8864	8718
ERR1577222	H14_ERR1577222	11954	13166	13240	13119	10440	12814	12273	12800	11825	10509	10067	9635	4461	4338	7214	5475	5214	5928	6690	6527	0	6610	4071	4781	6463	5794	4832	10554	5065	10882	10930	6973	6556	8407	13413	11725	12165	12187
ERR1577224	H16_ERR1577224	9966	9959	10169	10145	8275	9912	9753	9741	9509	8935	8607	8416	6767	6726	3683	901	7479	4091	3846	7993	6610	0	6860	5089	3815	4677	5297	8986	7292	9113	9178	7836	5099	3792	9693	9271	9682	9266
ERR1577225	H17_ERR1577225	11769	12870	12882	12780	9965	12413	11916	12426	11359	10014	9646	9285	4494	4608	7414	5704	5479	6269	7122	5905	4071	6860	0	5295	6812	6300	5392	10057	5281	10445	10464	6141	6656	8437	12925	11347	11695	11823
ERR1577227	H19_ERR1577227	13254	14144	14263	14128	11295	13732	13396	13797	13025	11858	11186	10714	5646	5424	4537	4249	7610	3473	4069	8616	4781	5089	5295	0	3817	3626	3679	11754	7328	12139	12146	8319	4867	6190	14111	12890	13200	13191
ERR1577229	H21_ERR1577229	13138	13732	13862	13784	11110	13184	12997	13261	12920	11766	11298	10721	6854	6787	3725	3285	8514	2681	3137	9507	6463	3815	6812	3817	0	3417	4440	11720	8274	12065	12130	9050	4745	5171	13332	12492	12861	12481
ERR1577231	H23_ERR1577231	13452	14204	14234	14124	11238	13773	13386	13650	13126	11855	11333	10836	6461	6281	4488	3936	7820	3080	3688	9173	5794	4677	6300	3626	3417	0	3798	11648	7719	12152	12252	8704	4675	6043	13797	12832	13097	13040
ERR1577234	H26_ERR1577234	12966	13224	14038	13923	11273	13333	12846	12887	12529	11522	11329	10459	5560	4958	5100	4498	6840	4134	4469	7966	4832	5297	5392	3679	4440	3798	0	11523	6505	11697	11741	7877	4738	6250	13658	12384	12609	12541
ERR1577235	H27_ERR1577235	4954	6055	6284	6169	3536	5305	4428	4988	3883	1955	2550	3597	10891	10936	13189	7481	9377	11557	12568	7275	10554	8986	10057	11754	11720	11648	11523	0	9676	2301	2293	7772	12989	13595	5171	3403	3736	3794
ERR1577238	H30_ERR1577238	10263	10820	11307	11271	10068	11188	10129	10971	9694	9277	9772	8766	5397	5540	9137	6023	3631	7910	8642	5119	5065	7292	5281	7328	8274	7719	6505	9676	0	8878	8960	5982	8494	9788	12528	10700	10873	10860
ERR1577239	H31_ERR1577239	4511	5150	5779	5715	4123	5016	3585	4243	2688	1705	3175	3546	11103	11333	13548	7499	9044	11912	12806	7101	10882	9113	10445	12139	12065	12152	11697	2301	8878	0	960	7849	13652	13856	5386	3397	3470	3635
ERR1577240	H32_ERR1577240	4410	4931	5680	5584	4237	4769	3395	4051	2512	1698	3261	3630	11119	11365	13608	7552	9023	11977	12874	7053	10930	9178	10464	12146	12130	12252	11741	2293	8960	960	0	7694	13734	13975	5367	3367	3476	3647
ERR1577241	H33_ERR1577241	9186	10025	10390	10289	8260	9924	9308	9790	8622	7898	7879	7582	6367	6744	10124	6541	6003	8547	9624	4999	6973	7836	6141	8319	9050	8704	7877	7772	5982	7849	7694	0	9226	10445	10691	9095	9249	9519
ERR1577242	H34_ERR1577242	14874	15950	15953	15823	12369	15436	15096	15372	14666	13241	12506	12057	7091	6884	5250	4375	8649	4771	5157	10029	6556	5099	6656	4867	4745	4675	4738	12989	8494	13652	13734	9226	0	6211	15525	14231	14523	14449
ERR1577243	H35_ERR1577243	15594	15986	16403	16301	12577	15737	15209	15347	14827	13547	12997	12379	8753	8617	5108	3163	10099	5308	5182	11104	8407	3792	8437	6190	5171	6043	6250	13595	9788	13856	13975	10445	6211	0	15405	14527	14834	14428
ERR956213	C3630_ERS659507	7642	7635	7902	7814	7104	6638	7219	6409	6828	5276	6126	7038	13770	13433	15098	8031	12253	13386	14735	10604	13413	9693	12925	14111	13332	13797	13658	5171	12528	5386	5367	10691	15525	15405	0	5728	5961	5479
ERR956220	C5802_ERS659514	5683	6106	6546	6449	5414	5447	5197	5036	4608	3333	4367	5062	12215	11827	14142	7720	10558	12494	13455	8587	11725	9271	11347	12890	12492	12832	12384	3403	10700	3397	3367	9095	14231	14527	5728	0	4201	4342
ERR956227	C6595_ERS659521	5772	6666	7017	6924	5707	5979	4231	5047	4690	3639	4744	5397	12418	12087	14491	8067	10687	12865	13868	8864	12165	9682	11695	13200	12861	13097	12609	3736	10873	3470	3476	9249	14523	14834	5961	4201	0	3931
ERR956241	C7246_ERS659535	6485	6537	7147	7021	5434	5738	4781	4462	5301	3556	4517	5110	12465	12339	14211	7643	10718	12645	13607	8718	12187	9266	11823	13191	12481	13040	12541	3794	10860	3635	3647	9519	14449	14428	5479	4342	3931	0
		Minimum:	0
		Maximum:	16403
