# Supplementary material for: Genomic Evidence for Direct Transmission of mecC-MRSA between a Horse and Its Veterinarian
Source: Antibiotics (Basel). 2023 Feb 17;12(2):408. doi: 10.3390/antibiotics12020408 (PMC9952710; doi:10.3390/antibiotics12020408)
Supplement: Supplementary file 1 [file antibiotics-12-00408-s001.zip › Table S3.xlsx]

## Sheet: CC130 S. aureus strains
Table S3. List of the selected CC130 strains used on comparative purposes.
No.	Tree Node ID	Isolate ID	Host	Country	ST type	Accession No.	Publication	DOI
1	EQ-B_ST130-t843_MRSA	EQ-B	horse	Hungary	ST130-t843 MRSA	PRJNA876088	This study	-
2	VET-1_ST130-t843_MRSA	VET-1	human	Hungary	ST130-t843 MRSA	PRJNA876088	This study	-
3	EQ-A1_ST130-t843_MRSA	EQ-A1	horse	Hungary	ST130-t843 MRSA	PRJNA876088	This study	-
4	H68B1_SRR13367367_MRSA_HUN_hedgehog	H68B1	hedgehog	Hungary	ST130-t843 MRSA	SRR13367367	Prevalence of Staphylococcus aureus in wild hedgehogs (Erinaceus europaeus) and first report of mecC-MRSA in Hungary	doi: 10.1016/j.scitotenv.2021.152858
5	Patient A1_ERR084771_MRSA_DNK_human	Patient A1	human	Denmark	ST130-t843 MRSA	ERR084771	Whole genome sequencing identifies zoonotic transmission of MRSA isolates with the novel mecA homologue mecC	doi: 10.1002/emmm.201202413
6	C6771_ERS1026449_MSSA_ESP_red deer	C6771	red deer	Spain	ST130-t1535 MSSA	ERR1422299	Genomic Analysis of Staphylococcus aureus of the Lineage CC130, Including mecC-Carrying MRSA and MSSA Isolates Recovered of Animal, Human, and Environmental Origins	doi: 10.3389/fmicb.2021.655994
7	C8671_ERS1026380_MRSA_ESP_magpie	C8671	magpie	Spain	ST1581-t843 MRSA	ERR1422306	Genomic Analysis of Staphylococcus aureus of the Lineage CC130, Including mecC-Carrying MRSA and MSSA Isolates Recovered of Animal, Human, and Environmental Origins	doi: 10.3389/fmicb.2021.655994
8	C8699_ERS1026424_MRSA_ESP_cinereous vulture	C8699	cinereous vulture	Spain	ST1571-t843 MRSA	ERR1422328	Genomic Analysis of Staphylococcus aureus of the Lineage CC130, Including mecC-Carrying MRSA and MSSA Isolates Recovered of Animal, Human, and Environmental Origins	doi: 10.3389/fmicb.2021.655994
9	C8483_ERS1026426_MRSA_ESP_rabbit	C8483	rabbit	Spain	ST130-t843 MRSA	ERR1422329	Genomic Analysis of Staphylococcus aureus of the Lineage CC130, Including mecC-Carrying MRSA and MSSA Isolates Recovered of Animal, Human, and Environmental Origins	doi: 10.3389/fmicb.2021.655994
10	Sheep B1_ERR144771_MRSA_DNK_sheep	Sheep B1	sheep	Denmark	ST130-t843 MRSA	ERR144771	Whole genome sequencing identifies zoonotic transmission of MRSA isolates with the novel mecA homologue mecC	doi: 10.1002/emmm.201202413
11	Patient B_ERR144788_MRSA_DNK_human	Patient B	human	Denmark	ST130-t843 MRSA	ERR144788	Whole genome sequencing identifies zoonotic transmission of MRSA isolates with the novel mecA homologue mecC	doi: 10.1002/emmm.201202413
12	Cow A_ERR144792_MRSA_DNK_cow	Cow A	cow	Denmark	ST130-t843 MRSA	ERR144792	Whole genome sequencing identifies zoonotic transmission of MRSA isolates with the novel mecA homologue mecC	doi: 10.1002/emmm.201202413
13	F1_ERR1577198_MRSA_DNK_swine	F1	swine	Denmark	CC130 MRSA	ERR1577198	Report of mecC-carrying MRSA in domestic swine	doi: 10.1093/jac/dkw389
14	H1a_ERR1577207_MRSA_DNK_human	H1a	human	Denmark	CC130 MRSA	ERR1577207	Report of mecC-carrying MRSA in domestic swine	doi: 10.1093/jac/dkw389
15	H4_ERR1577212_MRSA_DNK_human	H4	human	Denmark	CC130 MRSA	ERR1577212	Report of mecC-carrying MRSA in domestic swine	doi: 10.1093/jac/dkw389
16	H6_ERR1577214_MRSA_DNK_human	H6	human	Denmark	CC130 MRSA	ERR1577214	Report of mecC-carrying MRSA in domestic swine	doi: 10.1093/jac/dkw389
17	H7_ERR1577215_MRSA_DNK_human	H7	human	Denmark	CC130 MRSA	ERR1577215	Report of mecC-carrying MRSA in domestic swine	doi: 10.1093/jac/dkw389
18	H9_ERR1577217_MRSA_DNK_human	H9	human	Denmark	CC130 MRSA	ERR1577217	Report of mecC-carrying MRSA in domestic swine	doi: 10.1093/jac/dkw389
19	H10_ERR1577218_MRSA_DNK_human	H10	human	Denmark	CC130 MRSA	ERR1577218	Report of mecC-carrying MRSA in domestic swine	doi: 10.1093/jac/dkw389
20	H12_ERR1577220_MRSA_DNK_human	H12	human	Denmark	CC130 MRSA	ERR1577220	Report of mecC-carrying MRSA in domestic swine	doi: 10.1093/jac/dkw389
21	H14_ERR1577222_MRSA_DNK_human	H14	human	Denmark	CC130 MRSA	ERR1577222	Report of mecC-carrying MRSA in domestic swine	doi: 10.1093/jac/dkw389
22	H16_ERR1577224_MRSA_DNK_human	H16	human	Denmark	CC130 MRSA	ERR1577224	Report of mecC-carrying MRSA in domestic swine	doi: 10.1093/jac/dkw389
23	H17_ERR1577225_MRSA_DNK_human	H17	human	Denmark	CC130 MRSA	ERR1577225	Report of mecC-carrying MRSA in domestic swine	doi: 10.1093/jac/dkw389
24	H19_ERR1577227_MRSA_DNK_human	H19	human	Denmark	CC130 MRSA	ERR1577227	Report of mecC-carrying MRSA in domestic swine	doi: 10.1093/jac/dkw389
25	H21_ERR1577229_MRSA_DNK_human	H21	human	Denmark	CC130 MRSA	ERR1577229	Report of mecC-carrying MRSA in domestic swine	doi: 10.1093/jac/dkw389
26	H23_ERR1577231_MRSA_DNK_human	H23	human	Denmark	CC130 MRSA	ERR1577231	Report of mecC-carrying MRSA in domestic swine	doi: 10.1093/jac/dkw389
27	H26_ERR1577234_MRSA_DNK_human	H26	human	Denmark	CC130 MRSA	ERR1577234	Report of mecC-carrying MRSA in domestic swine	doi: 10.1093/jac/dkw389
28	H27_ERR1577235_MRSA_DNK_human	H27	human	Denmark	CC130 MRSA	ERR1577235	Report of mecC-carrying MRSA in domestic swine	doi: 10.1093/jac/dkw389
29	H30_ERR1577238_MRSA_DNK_human	H30	human	Denmark	CC130 MRSA	ERR1577238	Report of mecC-carrying MRSA in domestic swine	doi: 10.1093/jac/dkw389
30	H31_ERR1577239_MRSA_DNK_human	H31	human	Denmark	CC130 MRSA	ERR1577239	Report of mecC-carrying MRSA in domestic swine	doi: 10.1093/jac/dkw389
31	H32_ERR1577240_MRSA_DNK_human	H32	human	Denmark	CC130 MRSA	ERR1577240	Report of mecC-carrying MRSA in domestic swine	doi: 10.1093/jac/dkw389
32	H33_ERR1577241_MRSA_DNK_human	H33	human	Denmark	CC130 MRSA	ERR1577241	Report of mecC-carrying MRSA in domestic swine	doi: 10.1093/jac/dkw389
33	H34_ERR1577242_MRSA_DNK_human	H34	human	Denmark	CC130 MRSA	ERR1577242	Report of mecC-carrying MRSA in domestic swine	doi: 10.1093/jac/dkw389
34	H35_ERR1577243_MRSA_DNK_human	H35	human	Denmark	CC130 MRSA	ERR1577243	Report of mecC-carrying MRSA in domestic swine	doi: 10.1093/jac/dkw389
35	C3630_ERS659507_MSSA_TUN_sheep	C3630	sheep	Tunisia	ST700-t7579 MSSA	ERR956213	Genomic Analysis of Staphylococcus aureus of the Lineage CC130, Including mecC-Carrying MRSA and MSSA Isolates Recovered of Animal, Human, and Environmental Origins	doi: 10.3389/fmicb.2021.655994
36	C5802_ERS659514_MSSA_ESP_environmental	C5802	environmental	Spain	ST130-t843 MSSA	ERR956220	Genomic Analysis of Staphylococcus aureus of the Lineage CC130, Including mecC-Carrying MRSA and MSSA Isolates Recovered of Animal, Human, and Environmental Origins	doi: 10.3389/fmicb.2021.655994
37	C6595_ERS659521_MRSA_ESP_wood mouse	C6595	wood mouse	Spain	ST1945-t1535 MRSA	ERR956227	Genomic Analysis of Staphylococcus aureus of the Lineage CC130, Including mecC-Carrying MRSA and MSSA Isolates Recovered of Animal, Human, and Environmental Origins	doi: 10.3389/fmicb.2021.655994
38	C7246_ERS659535_MRSA_ESP_human	C7246	human	Spain	ST1945-t843 MRSA	ERR956241	Genomic Analysis of Staphylococcus aureus of the Lineage CC130, Including mecC-Carrying MRSA and MSSA Isolates Recovered of Animal, Human, and Environmental Origins	doi: 10.3389/fmicb.2021.655994
